# Supplementary material for: The role of terminal ligands in the slow relaxation of magnetisation and luminescence thermometry of dinuclear NdIII complexes
Source: Royal Society of Chemistry journal article supplement (doi:10.1039/d3qi00969f), 2023-01-01
Supplement: d3qi00969f1.pdf [file d3qi00969f1.pdf]

## Supplementary information

# The role of terminal ligands on the slow relaxation of magnetization and luminescence thermometry of dinuclear Nd<sup>III</sup> complexes

Airton G. Bispo-Jr, Diogo A. Gálico, Roberto M. Diaz-Rodriguez, Jeffrey S. Ovens, Fernando A. Sigoli,\* Muralee Murugesu\*

## Contents

|                                                            |    |
|------------------------------------------------------------|----|
| Supplementary Note S1 – Experimental Procedures .....      | 2  |
| Supplementary Note S2 – Infrared Spectra .....             | 4  |
| Supplementary Note S3 – Structural Analyses .....          | 5  |
| Supplementary Note S4 – Additional Magnetic Data .....     | 8  |
| Supplementary Note S5 – Additional Luminescence Data ..... | 15 |

## Supplementary Note S1 – Experimental Procedures

### Synthesis

**H<sub>2</sub>valdien proligand.** H<sub>2</sub>valdien (*N*<sup>1</sup>,*N*<sup>3</sup>-bis(3-methoxysalicylidene)diethylenetriamine) was obtained from the condensation of *o*-vanillin (TCI America, 99.0%) and diethylenetriamine (Sigma-Aldrich, 99%) as described in reference 1.

**[Nd<sub>2</sub>(valdien)<sub>2</sub>(acac)<sub>2</sub>] ({1-Nd<sub>2</sub>}).** H<sub>2</sub>valdien (0.250 mmol, 0.092 g) and [Nd(acac)<sub>3</sub>(H<sub>2</sub>O)<sub>2</sub>] (Sigma-Aldrich, 99%, 0.250 mmol, 0.124 g) were dissolved in 9 mL of MeOH/DMF (2:1 v/v). Triethylamine (Fisher Chemical, 99%, 0.500 mmol, 70 μL) was then added; the yellow solution was stirred for 5 min, then filtered. Rectangular-shaped yellow crystals were obtained after one day by diffusion of diethyl ether vapour into the filtrate at room temperature. IR (Fig. S1):  $\bar{\nu} = 2869$  (w), 1658 (s), 1603 (s), 1515 (m), 1440 (m), 1386 (s), 1326 (m), 1270 (m), 1237 (s), 1212 (s), 1091 (s), 915 (m), 852 (m), 786 (w), 746 (s), 659 (m) cm<sup>-1</sup>.<sup>1</sup> Anal. Calcd (%) for C<sub>50</sub>H<sub>60</sub>N<sub>6</sub>Nd<sub>2</sub>O<sub>12</sub> (1225.52 g mol<sup>-1</sup>): C, 49.00; H, 6.86; N, 4.41. Found: C, 49.60; H, 4.41; N, 7.01.

**[Nd<sub>2</sub>(valdien)<sub>2</sub>(NO<sub>3</sub>)<sub>2</sub>] ({2-Nd<sub>2</sub>}).** A solution of triethylamine (0.500 mmol, 70 μL) and Nd(NO<sub>3</sub>)<sub>3</sub>·6H<sub>2</sub>O (Sigma-Aldrich, 99%, 0.250 mmol) in 4 mL of MeOH/CH<sub>2</sub>Cl<sub>2</sub> (1:1 v/v) was added to a solution of H<sub>2</sub>valdien (0.250 mmol, 0.092 g) in 5 mL of MeOH/CH<sub>2</sub>Cl<sub>2</sub> (1:1 v/v). The resulting yellow solution was stirred for 5 min and then filtered. Crystals were grown in the same way as described above for {1-Nd<sub>2</sub>}. IR (Fig. S1):  $\bar{\nu} = 3208$  (m), 2906 (m), 1635 (m), 1617 (s), 1546 (w), 1489 (m), 1465 (m), 1436 (s), 1400 (m), 1384 (s), 1349 (w), 1323 (m), 1271 (m), 1240 (s), 1215 (m), 1167 (w), 1106 (w), 1076 (m), 1039 (w), 997 (w), 968 (m), 916 (w), 853 (w), 735 (s), 621 (w) cm<sup>-1</sup>.<sup>1</sup> Anal. Calcd (%) for C<sub>40</sub>H<sub>46</sub>N<sub>8</sub>Nd<sub>2</sub>O<sub>14</sub> (1151.33 g mol<sup>-1</sup>): C, 41.66; H, 4.02; N, 8/80. Found: C, 39.20; H, 4.04; N, 11.13.

### Characterization

**Single-crystal X-ray diffraction.** Crystallographic data were collected from single crystals mounted on MiTeGen MicroMounts using Parabar 10312 oil. Data were collected using Bruker AXS APEX II KAPPA or SMART single crystal diffractometers equipped with sealed tube Mo K $\alpha$  sources ( $\lambda = 0.71073$  Å), graphite monochromators, and APEX II CCD detectors. Raw data collection and processing were performed with the APEX II software package from Bruker.<sup>2</sup> Initial unit cell parameters were determined using 36 data frames from selected  $\omega$  scans. Semi-empirical absorption corrections based on equivalent reflections were applied.<sup>3</sup> Systematic absences in the diffraction dataset and unit cell parameters were consistent with the assigned space group. The initial structural solutions were determined using ShelXT direct methods,<sup>4</sup> and refined with full-matrix least-squares procedures based on F<sup>2</sup> using ShelXL and ShelXle.<sup>5</sup> Hydrogen atoms were placed geometrically and refined using a riding model. Twinning in {2-Nd<sub>2</sub>} was determined via PLATON, and subsequently refined in ShelXle.

**Infrared spectroscopy.** Fourier transform infrared (FTIR) spectra were recorded in the  $\bar{\nu} = 4000$ -525 cm<sup>-1</sup> range using a Nicolet 6700 FTIR spectrometer equipped with an attenuated total reflectance (ATR) attachment.

**Photoluminescence.** All photoluminescence data were obtained for powdered samples using a Horiba QuantaMaster 8075-21 spectrofluorometer equipped with a liquid-nitrogen-cooled InGaAs detector for the near-infrared range (900 – 1550 nm). An ozone-free PowerArc 75 W xenon lamp was used as the radiation source. The emission spectra were corrected according to the optical system of the emission monochromator and the detector response.

For temperature-dependent luminescence, excitation and emission spectra from 10 K to 330 K were measured. To control the temperature, a Janis CCS-100/204N cryostat with an Acme Electric T181059 compressor and a LakeShore 335 temperature controller were used. The relative thermal sensitivity  $S_r$  is calculated from eqn S1, where  $\Delta$  is the thermometric parameter and  $T$  is the temperature. The temperature uncertainty  $\delta T$  is calculated using eqn S2, where  $\delta I/I$  is the relative uncertainty in the integrated area.<sup>6</sup>

$$S_r = \frac{1}{\Delta} \left| \frac{d\Delta}{dT} \right| \quad (S1)$$

$$\delta T = \frac{1}{S_r} \frac{\delta \Delta}{\Delta} \quad (S2)$$

$$\frac{\delta \Delta}{\Delta} = \sqrt{\left( \frac{\delta I_1}{I_1} \right)^2 + \left( \frac{\delta I_2}{I_2} \right)^2} \quad (S3)$$

**Magnetometry.** Magnetic measurements were performed using a Quantum Design PPMS Dynacool-14T physical property measurement system equipped with a vibrating sample magnetometer (VSM), operating between 1.8 and 300 K. DC and AC measurements were performed on a crushed polycrystalline sample of 27.1 mg for **{1-Nd<sub>2</sub>}** and 33.0 mg for **{2-Nd<sub>2</sub>}**. Both samples analyzed here come from the same batch where bulk purity was confirmed through, PXRD, elemental analysis and IR spectroscopy. The samples were restrained in a matrix of vacuum grease (Corning) and wrapped in a polyethylene membrane. The magnetization data were collected at 100 K to check for ferromagnetic impurities, which were absent in both samples. Diamagnetic corrections were applied for the sample holder, and the inherent diamagnetism of the samples was estimated with the use of Pascal's constants.

## Supplementary Note S2 – Infrared Spectra

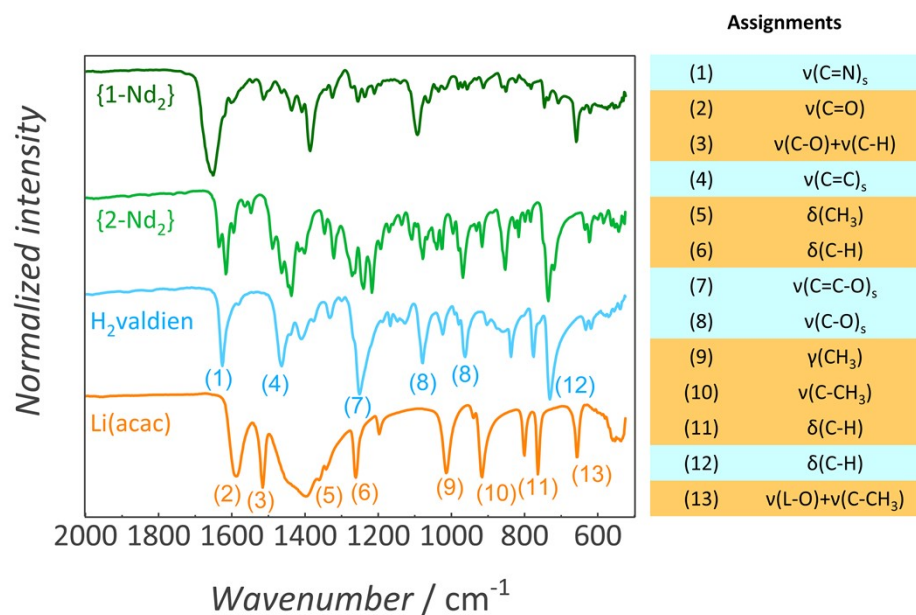

**Fig. S1.** FTIR spectra (293 K) of **{1-Nd<sub>2</sub>}** and **{2-Nd<sub>2</sub>}** crushed crystals compared to powder H<sub>2</sub>valdien and Li(acac). On the right, assignments of the H<sub>2</sub>valdien vibrational modes are highlighted in light blue and those of Li(acac) in orange.

## Supplementary Note S3 – Structural Analyses

**Table S1.** Crystallographic data for {1-Nd<sub>2</sub>} and {2-Nd<sub>2</sub>}.

|                                                                            | {1-Nd <sub>2</sub> }                                                           | {2-Nd <sub>2</sub> }                                                           |
|----------------------------------------------------------------------------|--------------------------------------------------------------------------------|--------------------------------------------------------------------------------|
| CCDC deposition number                                                     | 2242690                                                                        | 2242689                                                                        |
| Temperature, K                                                             | 273                                                                            | 200                                                                            |
| Empirical formula                                                          | C <sub>50</sub> H <sub>60</sub> N <sub>6</sub> Nd <sub>2</sub> O <sub>12</sub> | C <sub>40</sub> H <sub>46</sub> N <sub>8</sub> Nd <sub>2</sub> O <sub>14</sub> |
| Molecular weight, g mol <sup>-1</sup>                                      | 1225.52                                                                        | 1151.33                                                                        |
| Radiation (wavelength, Å)                                                  | Mo Kα (0.71073)                                                                | Mo Kα (0.71073)                                                                |
| Crystal system                                                             | Monoclinic                                                                     | Monoclinic                                                                     |
| Space group                                                                | <i>P2<sub>1</sub>/n</i>                                                        | <i>P2<sub>1</sub>/c</i>                                                        |
| <i>a</i> , Å                                                               | 12.4641(10)                                                                    | 22.5475(9)                                                                     |
| <i>b</i> , Å                                                               | 10.6436(8)                                                                     | 10.3176(4)                                                                     |
| <i>c</i> , Å                                                               | 18.7115(16)                                                                    | 20.0493(8)                                                                     |
| α, °                                                                       | 90                                                                             | 90                                                                             |
| β, °                                                                       | 95.694(3)                                                                      | 112.018(2)                                                                     |
| γ, °                                                                       | 90                                                                             | 90                                                                             |
| Volume                                                                     | 2470.1(3)                                                                      | 4324.0(3)                                                                      |
| <i>Z</i>                                                                   | 2                                                                              | 4                                                                              |
| Density (ρ), g cm <sup>-3</sup> calc'd.                                    | 1.648                                                                          | 1.769                                                                          |
| μ, mm <sup>-1</sup>                                                        | 2.147                                                                          | 2.451                                                                          |
| F(0 0 0)                                                                   | 1236.0                                                                         | 2296.0                                                                         |
| Crystal size, mm <sup>3</sup>                                              | 0.019 x 0.169 x 0.25                                                           | 0.077 x 0.095 x 0.109                                                          |
| Theta range, °                                                             | 1.880 - 26.410                                                                 | 1.949 - 26.629                                                                 |
| Index ranges (h,k,l)                                                       | (15 13 23)                                                                     | (27 12 25)                                                                     |
| No. of reflections measured                                                | 5067                                                                           | 8990                                                                           |
| No. of independent reflections                                             | 3199                                                                           | 5697                                                                           |
| R(int)                                                                     | 0.092                                                                          | -                                                                              |
| Completeness, %                                                            | 0.998                                                                          | 0.989                                                                          |
| Max. and min. transmission                                                 | 0.7454 / 0.6199                                                                | 0.745 / 0.694                                                                  |
| Data / restraints / parameters                                             | 5067 / 0 / 320                                                                 | 8990 / 632 / 582                                                               |
| R <sub>1</sub> , wR <sub>2</sub> ( <i>I</i> > 2σ( <i>I</i> )) <sup>a</sup> | 0.0562, 0.1063                                                                 | 0.0597, 0.1231                                                                 |
| R <sub>1</sub> , wR <sub>2</sub> (all data)                                | 0.1085, 0.1220                                                                 | 0.1101, 0.1417                                                                 |
| Goodness of fit on F <sup>2</sup>                                          | 1.028                                                                          | 1.044                                                                          |
| Largest differential peak and hole, e <sup>-</sup> /Å <sup>3</sup>         | 1.62 / -1.13                                                                   | 1.583 / -2.440                                                                 |

$$R = R_1 = \sum_a \frac{||F_0| - |F_c||}{\sum |F_0|}$$

$$wR_2 = \left\{ \frac{\sum [w(F_0^2 - F_c^2)^2]}{\sum [w(F_0^2)]} \right\}^{1/2}$$

$$\text{Where } w = 1/[\sigma(F_0^2) + (ap)^2 + bp]$$

$$p = [\max(F_0^2, 0)] + 2F_c^2/3$$

$$R_w = [w(|F_0| - |F_c|)^2/w|F_0|^2]^{1/2}$$

$$\text{Where } w = 1/\sigma^2(|F_0|)$$

**Table S2.** Intramolecular H-bond distance, intramolecular Nd – Nd distance, shortest intermolecular Nd ... Nd distance, and Nd - O - Nd angle in **{1-Nd<sub>2</sub>}** and **{2-Nd<sub>2</sub>}**.

|                           | H-bond / Å | Nd - Nd / Å | Nd ... Nd / Å | Nd - O - Nd / ° |
|---------------------------|------------|-------------|---------------|-----------------|
| <b>{1-Nd<sub>2</sub>}</b> | 1.98(4)    | 4.0732(6)   | 9.093(9)      | 110.14(14)      |
| <b>{2-Nd<sub>2</sub>}</b> | 1.95(7)    | 3.9364(7)   | 8.619(8)      | 108.59(12)      |

**Table S3.** Selected Nd – O and Nd – N distances in **{1-Nd<sub>2</sub>}** and **{2-Nd<sub>2</sub>}**.

| <b>{1-Nd<sub>2</sub>}</b> |              | <b>{2-Nd<sub>2</sub>}</b> |              |
|---------------------------|--------------|---------------------------|--------------|
| Bond                      | Distance / Å | Bond                      | Distance / Å |
| Nd – O5*                  | 2.4133(52)   | Nd – O12*                 | 2.5509(73)   |
| Nd – O6*                  | 2.4173(49)   | Nd – O14*                 | 2.5372(10)   |
| Nd – O3**                 | 2.4665(37)   | Nd – O9**                 | 2.4031(68)   |
| Nd – O3'**                | 2.5014(41)   | Nd – O9'**                | 2.4444(68)   |
| Nd – O2                   | 2.2780(51)   | Nd – O11                  | 2.4792(68)   |
| Nd – N1                   | 2.6398(62)   | Nd – N5                   | 2.6202(70)   |
| Nd – N2                   | 2.6488(53)   | Nd – N6                   | 2.5833(83)   |
| Nd – N3                   | 2.6698(58)   | Nd – N7                   | 2.6184(74)   |

\*Nd – O<sub>term.</sub> \*\*Nd – O<sub>core.</sub>

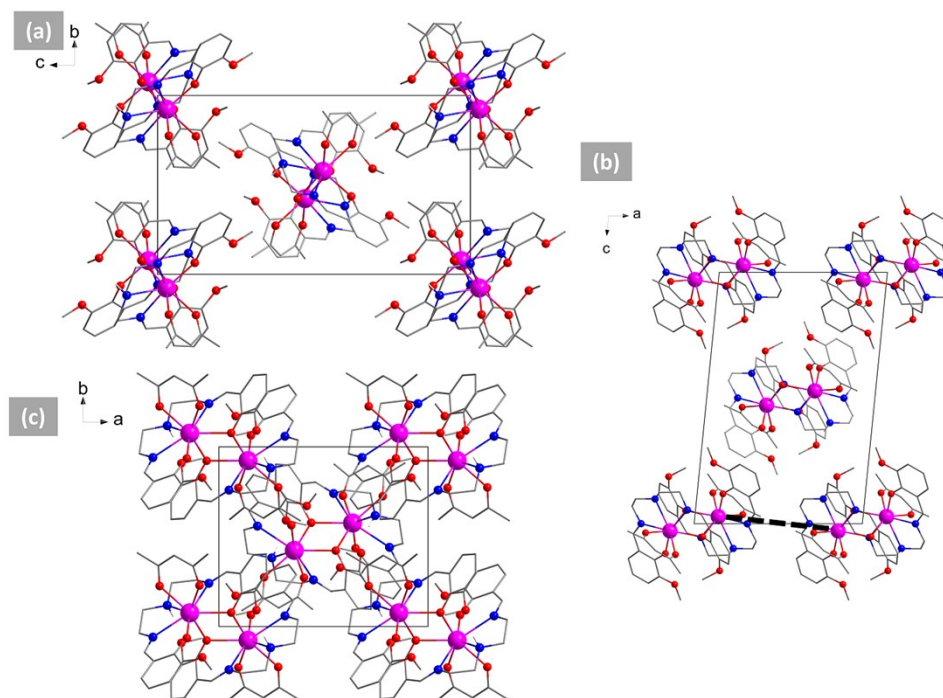

**Fig. S2.** View of the packing arrangement along the crystallographic (a) *a*, (b) *b*, and (c) *c*-axis in **{1-Nd<sub>2</sub>}**. The black dashed line represents the shortest Nd – Nd intermolecular distance. Hydrogen atoms are omitted for clarity.

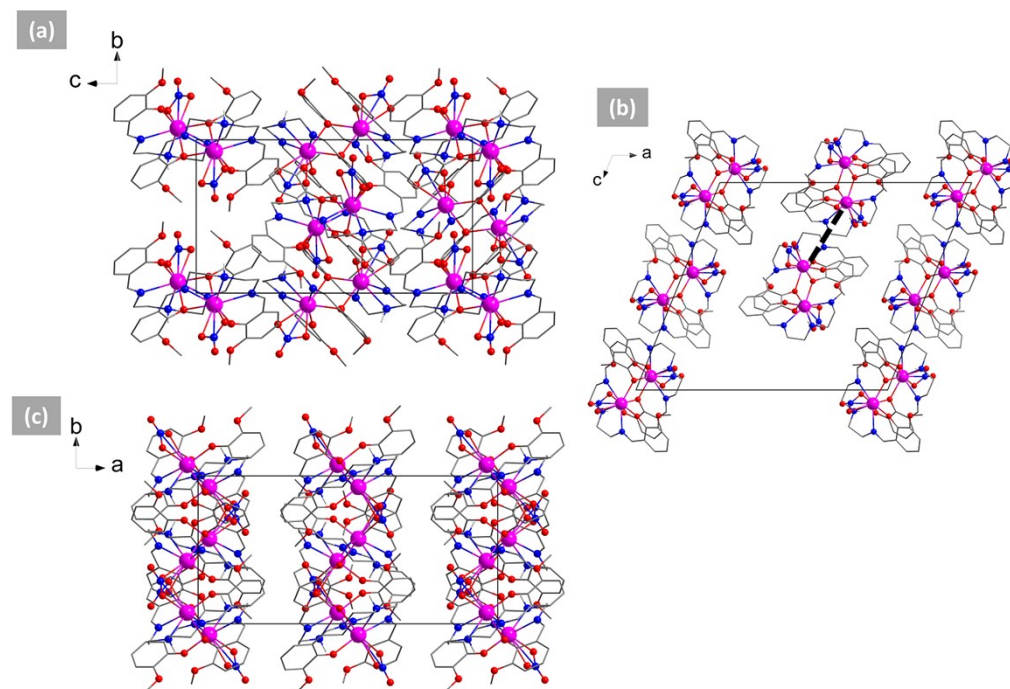

**Fig. S3.** View of the packing arrangement along the crystallographic (a) *a*, (b) *b*, and (c) *c*-axis in **{2-Nd<sub>2</sub>}**. The black dashed line represents the shortest Nd – Nd intermolecular distance. Hydrogen atoms are omitted for clarity.

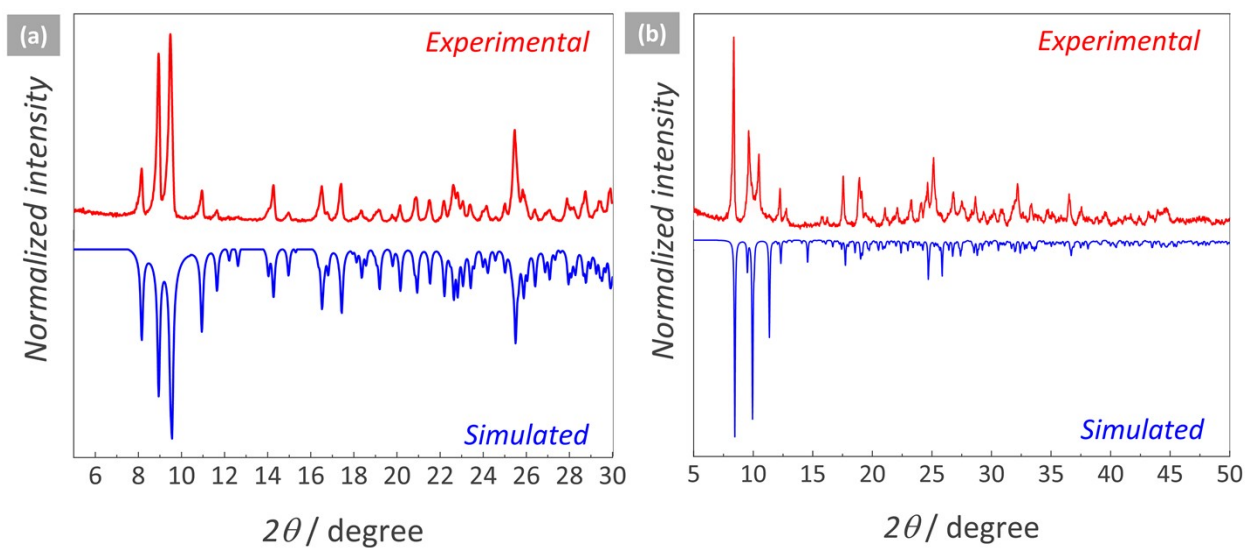

**Fig. S4.** Powder X-ray diffractograms of (a) **{1-Nd<sub>2</sub>}** and (b) **{2-Nd<sub>2</sub>}** compared to the simulated patterns determined from the single-crystal structures.

## Supplementary Note S4 – Additional Magnetic Data

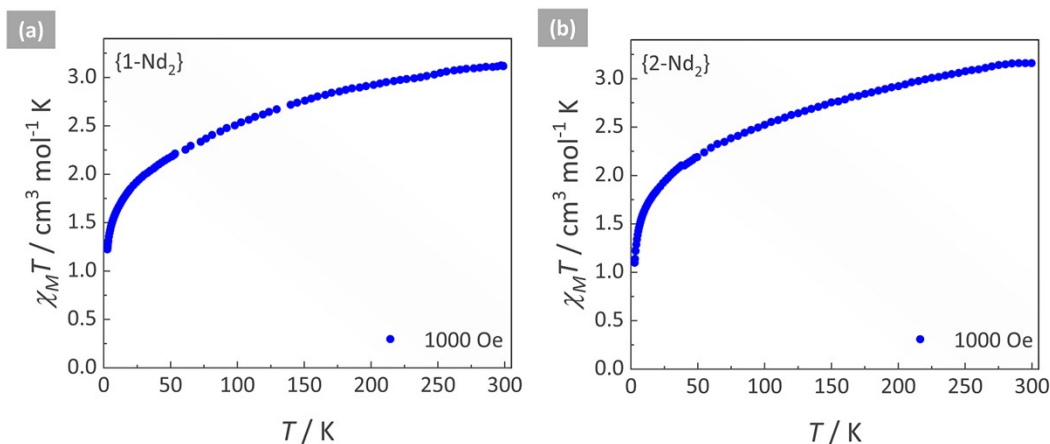

**Fig. S5.** Temperature dependence of the  $\chi_M T$  product under an applied field of 1000 Oe for  $\{1\text{-Nd}_2\}$  and  $\{2\text{-Nd}_2\}$ , with  $\chi_M$  being the molar magnetic susceptibility per molecule, defined as  $M/H$ .

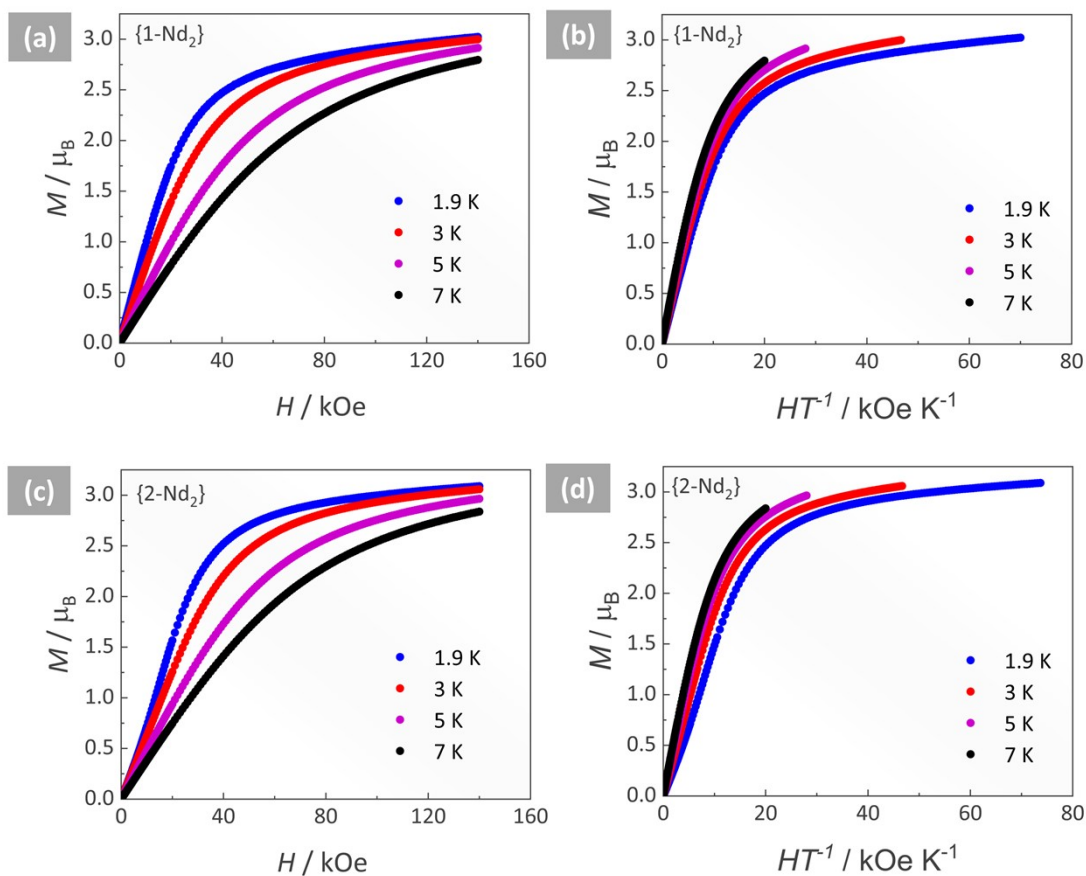

**Fig. S6.** Isothermal field dependence of the magnetization ((a) and (c)) and the reduced magnetization  $HT^{-1}$  ((b) and (d)) at the indicated temperatures for  $\{1\text{-Nd}_2\}$  and  $\{2\text{-Nd}_2\}$ . The obtained data reveal that in the magnetization ( $M$  vs.  $H$ ) and reduced magnetization ( $M$  vs.  $HT^{-1}$ ) plots, the magnetization increases as temperature decreases and the magnetic field increases, whose maximum is achieved at 3.02  $\mu_B$  (1.9 K), 2.99  $\mu_B$  (3.0 K), 2.91  $\mu_B$  (5.0 K), and 2.79  $\mu_B$  (7 K) for  $\{1\text{-Nd}_2\}$  and at 3.09  $\mu_B$  (1.9 K), 3.06  $\mu_B$  (3.0 K), 2.97  $\mu_B$  (5.0 K), and 2.84  $\mu_B$  (7 K) for  $\{2\text{-Nd}_2\}$ .



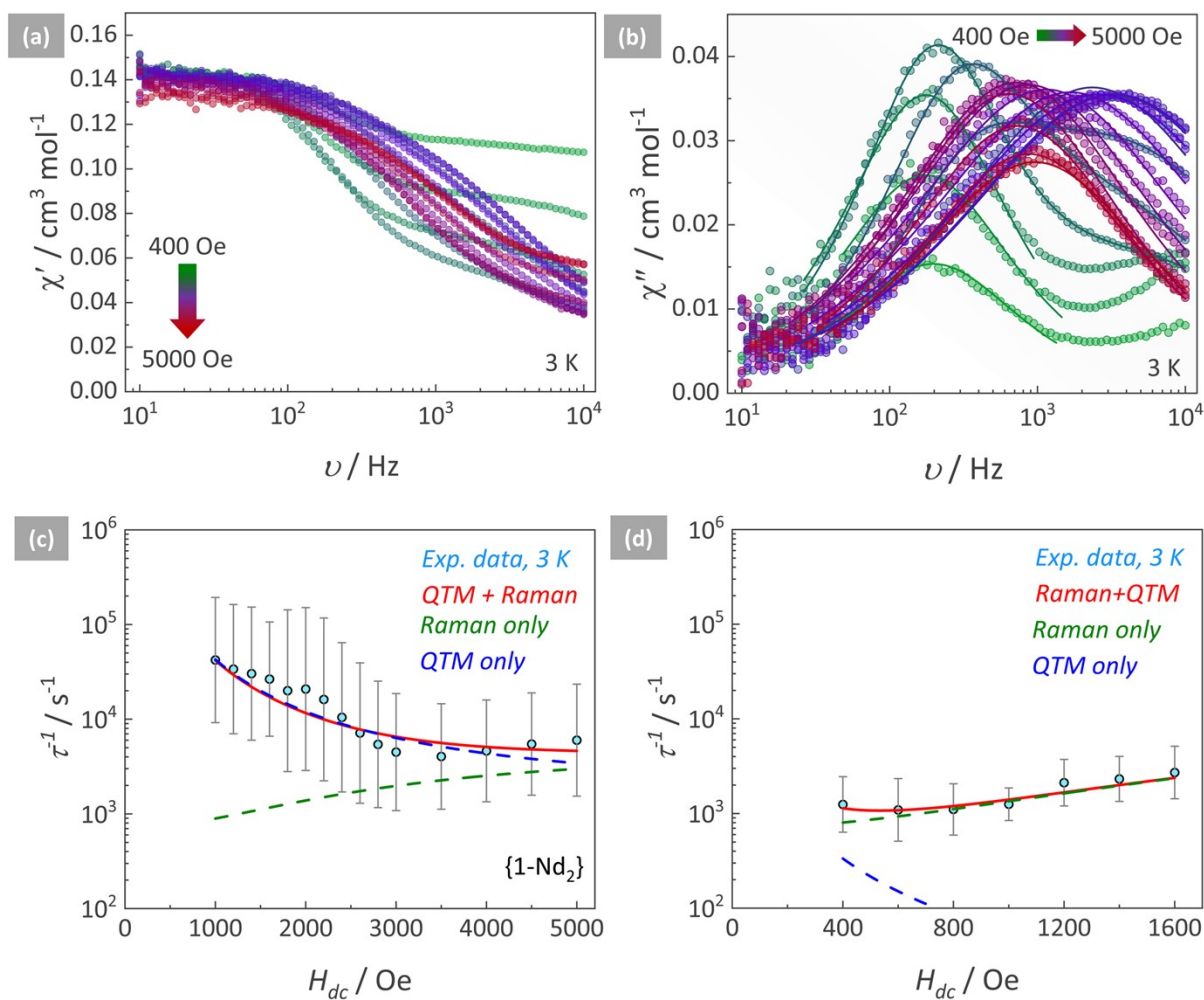

**Fig. S7.** Frequency dependence of the (a) in-phase ( $\chi'$ ) and (b) out-of-phase ( $\chi''$ ) molar magnetic susceptibility as a function of applied field  $H_{dc}$  from 400 Oe to 5000 Oe at 3 K for  $\{1\text{-Nd}_2\}$ . The solid lines in (b) represent fits to the single ( $H_{dc} = 400 - 800$  Oe,  $1800 - 4500$  Oe) or double ( $H_{dc} = 1000 - 1600$  Oe) Debye model, with best-fitting parameters given in Table S4. For the curves obtained at 400, 600, and 800 Oe, although a tailing component is noticed in the high-frequency region, the peak maximum is out of range, thus a single Debye model was applied considering only the main observed component. Field dependence of the relaxation time of magnetization ( $\tau$ ) at 3 K for the (b) high-frequency (HF) and (c) low-frequency (LF) processes. The solid lines represent the best fit according to eqn 1, with parameters given in Table S5.

**Table S4.** Best-fitting parameters of the generalized single or double Debye model for the frequency dependence of the out-of-phase molar magnetic susceptibility ( $\chi''$ ) as a function of applied field ( $H_{dc}$ ) at 3 K for **{1-Nd<sub>2</sub>}**.

| $H_{dc}$<br>/ Oe | $\chi_s$<br>/ $\text{cm}^3 \text{mol}^{-1}$ | $\chi_t$<br>/ $\text{cm}^3 \text{mol}^{-1}$ | $\alpha$ | $\tau$ / s | $\chi_s$<br>/ $\text{cm}^3 \text{mol}^{-1}$ | $\chi_t$<br>/ $\text{cm}^3 \text{mol}^{-1}$ | $\alpha$ | $\tau$ / s |
|------------------|---------------------------------------------|---------------------------------------------|----------|------------|---------------------------------------------|---------------------------------------------|----------|------------|
| 400              |                                             |                                             |          |            | 0.00674                                     | 0.04326                                     | 0.1093   | 8.02042E-4 |
| 600              |                                             |                                             |          |            | 6.79243E-4                                  | 0.06453                                     | 0.13181  | 9.15881E-4 |
| 800              |                                             |                                             |          |            | 2.01801E-5                                  | 0.08242                                     | 0.09596  | 9.04955E-4 |
| 1000             | 0.00212                                     | 0.04727                                     | 0.32194  | 2.36914E-5 | 0                                           | 0.08136                                     | 0.04357  | 7.9746E-4  |
| 1200             | 0.00443                                     | 0.06325                                     | 0.33243  | 2.95706E-5 | 0                                           | 0.07147                                     | 0.08144  | 4.72736E-4 |
| 1400             | 0.00405                                     | 0.09477                                     | 0.34235  | 3.2983E-5  | 0.01652                                     | 0.05885                                     | 0.0768   | 4.31072E-4 |
| 1600             | 0.00111                                     | 0.10151                                     | 0.2919   | 3.76614E-5 | 0                                           | 0.03018                                     | 0.0995   | 3.68732E-4 |
| 1800             | 1.63826E-4                                  | 0.14172                                     | 0.40851  | 4.99457E-5 |                                             |                                             |          |            |
| 2000             | 8.91324E-4                                  | 0.14322                                     | 0.41104  | 4.79975E-5 |                                             |                                             |          |            |
| 2200             | 9.01585E-4                                  | 0.14319                                     | 0.41076  | 6.17505E-5 |                                             |                                             |          |            |
| 2400             | 6.28609E-5                                  | 0.13543                                     | 0.38124  | 9.54981E-5 |                                             |                                             |          |            |
| 2600             | 6.63461E-5                                  | 0.1313                                      | 0.35991  | 1.39861E-4 |                                             |                                             |          |            |
| 2800             | 9.00882E-4                                  | 0.12592                                     | 0.32523  | 1.84095E-4 |                                             |                                             |          |            |
| 3000             | 0.0011                                      | 0.12146                                     | 0.29972  | 2.22174E-4 |                                             |                                             |          |            |
| 3500             | 0.00178                                     | 0.1113                                      | 0.26684  | 2.47231E-4 |                                             |                                             |          |            |
| 4000             | 3.4885E-4                                   | 0.09632                                     | 0.25602  | 2.15965E-4 |                                             |                                             |          |            |
| 4500             | 1.04905E-4                                  | 0.08624                                     | 0.25725  | 1.8288E-4  |                                             |                                             |          |            |
| 5000             | 5.32287E-4                                  | 0.08795                                     | 0.28589  | 1.66275E-4 |                                             |                                             |          |            |

**Table S5.** Summary of the best-fitting parameters of the field dependence of the relaxation time of magnetization ( $\tau$ ) for **{1-Nd<sub>2</sub>}** at 3 K. HF = high frequency, LF = low frequency.

| Mechanism | Parameter | HF process                            | LF process                            |
|-----------|-----------|---------------------------------------|---------------------------------------|
| QTM       | <i>B1</i> | $1.30 \cdot 10^4 \text{ s}^{-1}$      | $3.32 \cdot 10^{10} \text{ s}^{-1}$   |
|           | <i>B2</i> | $2.48 \cdot 10^{-4} \text{ Oe}^{-2}$  | $0.81 \text{ Oe}^{-2}$                |
| Raman     | <i>C</i>  | $0.051 \text{ s}^{-1} \text{ K}^{-n}$ | $0.051 \text{ s}^{-1} \text{ K}^{-n}$ |
|           | <i>C1</i> | $9.30 \cdot 10^{-7} \text{ Oe}^{-2}$  | $3.45 \cdot 10^{-7} \text{ Oe}^{-2}$  |
|           | <i>C2</i> | 0                                     | $4.99 \cdot 10^{-8} \text{ Oe}^{-2}$  |
|           | <i>n</i>  | 8.66                                  | 8.66                                  |

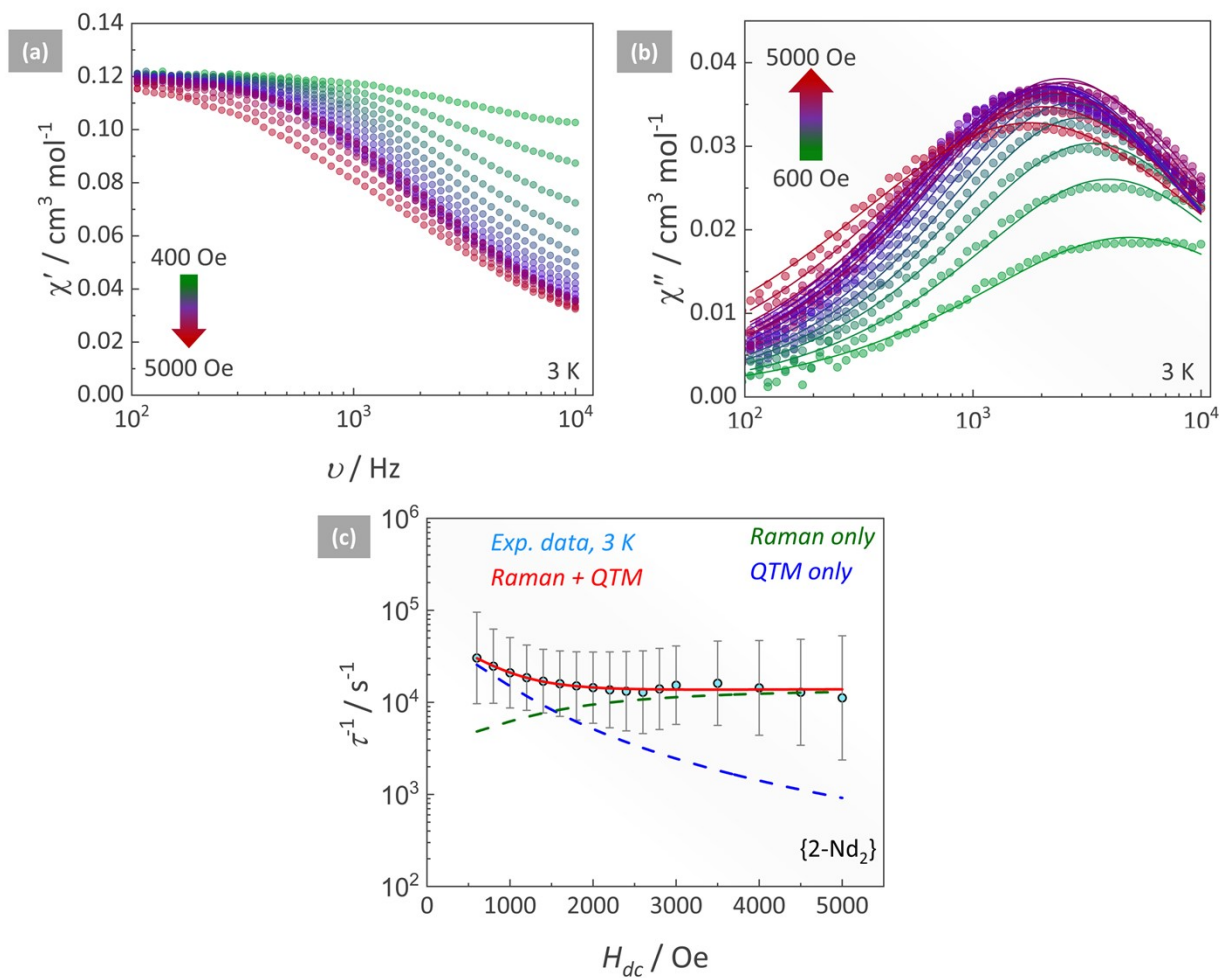

**Fig. S8.** (a) Frequency dependence of the out-of-phase molar magnetic susceptibility ( $\chi''$ ) as a function of applied field  $H_{dc}$  from 600 Oe to 5000 Oe at 3 K for  $\{2\text{-Nd}_2\}$ . The solid lines represent fits to the single Debye model, with parameters given in Table S6. (b) Field dependence of the relaxation time of magnetization ( $\tau$ ) at 3 K. The solid lines represent the best fit to the QTM and Raman processes according to eqn 1, with parameters given in Table S7.

**Table S6.** Best-fitting parameters of the generalized single Debye model for the frequency dependence of the out-of-phase molar magnetic susceptibility ( $\chi''$ ) as a function of applied field  $H_{dc}$  at 3 K for **{2-Nd<sub>2</sub>}**.

| $H_{dc}$ / Oe | $\chi_s$ / cm <sup>3</sup> mol <sup>-1</sup> | $\chi_t$ / cm <sup>3</sup> mol <sup>-1</sup> | $\alpha$ | $\tau$ / s |
|---------------|----------------------------------------------|----------------------------------------------|----------|------------|
| 600           | 0.00964                                      | 0.06513                                      | 0.23275  | 3.28722E-5 |
| 800           | 0.23276                                      | 0.30173                                      | 0.17658  | 4.04311E-5 |
| 1000          | 0.23032                                      | 0.30903                                      | 0.16383  | 4.76292E-5 |
| 1200          | 0.27234                                      | 0.3566                                       | 0.14684  | 5.38585E-5 |
| 1400          | 0.15601                                      | 0.24399                                      | 0.14124  | 5.87928E-5 |
| 1600          | 0.00421                                      | 0.09579                                      | 0.14711  | 6.25654E-5 |
| 1800          | 9.25971E-7                                   | 0.0946                                       | 0.15662  | 6.62278E-5 |
| 2000          | 0.00212                                      | 0.09892                                      | 0.16668  | 6.91059E-5 |
| 2200          | 2.7887E-6                                    | 0.09928                                      | 0.18167  | 7.30589E-5 |
| 2400          | 2.56307E-4                                   | 0.10125                                      | 0.1939   | 7.55534E-5 |
| 2600          | 4.12469E-4                                   | 0.10306                                      | 0.20472  | 7.7507E-5  |
| 2800          | 6.33052E-5                                   | 0.10324                                      | 0.19936  | 7.14269E-5 |
| 3000          | 7.73523E-5                                   | 0.10329                                      | 0.1904   | 6.508E-5   |
| 3500          | 4.2872E-5                                    | 0.10544                                      | 0.20962  | 6.19151E-5 |
| 4000          | 1.2769E-5                                    | 0.10745                                      | 0.24287  | 6.95402E-5 |
| 4500          | 1.11431E-4                                   | 0.109                                        | 0.27721  | 7.76062E-5 |
| 5000          | 8.9449E-4                                    | 0.11356                                      | 0.32872  | 8.9287E-5  |

**Table S7.** Summary of the best-fitting parameters of the field dependence of the relaxation time of magnetization ( $\tau$ ) for **{2-Nd<sub>2</sub>}** at 3 K.

| Mechanism | Parameter | Value                                |
|-----------|-----------|--------------------------------------|
| QTM       | $B1$      | $4.21 \cdot 10^4 \text{ s}^{-1}$     |
|           | $B2$      | $1.82 \cdot 10^{-6} \text{ T}^{-2}$  |
| Raman     | $C$       | $56.8 \text{ s}^{-1} \text{ K}^{-n}$ |
|           | $C1$      | $1.11 \cdot 10^{-6} \text{ Oe}^{-2}$ |
|           | $C2$      | $2.93 \cdot 10^{-7} \text{ Oe}^{-2}$ |
|           | $n$       | 3.83                                 |

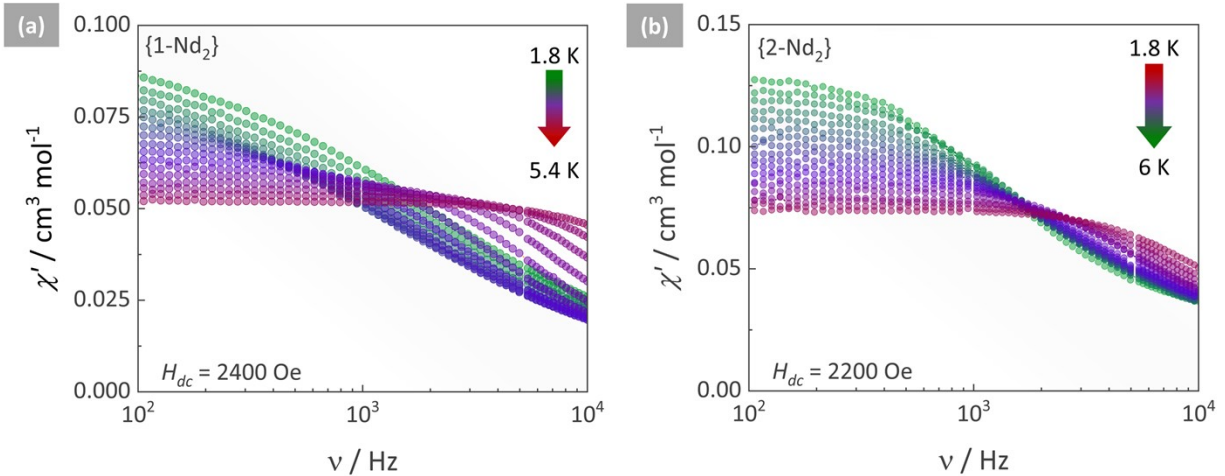

**Fig. S9.** Frequency dependence of the in-phase molar magnetic susceptibility ( $\chi'$ ) as a function of temperature for (a) **{1-Nd<sub>2</sub>}** ( $H_{dc} = 2400$  Oe) and (b) **{2-Nd<sub>2</sub>}** ( $H_{dc} = 2200$  Oe).

**Table S8.** Best-fitting parameters of the generalized single Debye model for the frequency dependence of the out-of-phase molar magnetic susceptibility ( $\chi''$ ) as a function of temperature for **{1-Nd<sub>2</sub>}** ( $H_{dc} = 2400$  Oe).

| T / K | $\chi_s / \text{cm}^3 \text{mol}^{-1}$ | $\chi_t / \text{cm}^3 \text{mol}^{-1}$ | $\alpha$ | $\tau / \text{s}$ |
|-------|----------------------------------------|----------------------------------------|----------|-------------------|
| 1.8   | 8.16633E-5                             | 0.10864                                | 0.42269  | 8.61915E-5        |
| 2     | 1.8089E-4                              | 0.10308                                | 0.42569  | 8.46894E-5        |
| 2.2   | 3.12625E-4                             | 0.0977                                 | 0.42446  | 8.60084E-5        |
| 2.4   | 9.25943E-5                             | 0.09358                                | 0.42912  | 8.77954E-5        |
| 2.6   | 1.28269E-5                             | 0.08743                                | 0.41377  | 9.09255E-5        |
| 2.8   | 2.35535E-4                             | 0.08379                                | 0.40785  | 9.30993E-5        |
| 3     | 0.00179                                | 0.07959                                | 0.38081  | 9.44677E-5        |
| 3.2   | 9.88094E-4                             | 0.07348                                | 0.34823  | 9.63502E-5        |
| 3.4   | 5.24664E-4                             | 0.06906                                | 0.31558  | 9.16657E-5        |
| 3.6   | 7.66005E-4                             | 0.06438                                | 0.26552  | 8.48152E-5        |
| 3.8   | 6.29881E-5                             | 0.06001                                | 0.21781  | 7.55721E-5        |
| 4     | 3.96934E-4                             | 0.05734                                | 0.173    | 6.3591E-5         |
| 4.2   | 5.12218E-4                             | 0.05436                                | 0.12489  | 5.08518E-5        |
| 4.4   | 4.74341E-6                             | 0.05117                                | 0.08454  | 3.87456E-5        |
| 4.6   | 1.99302E-7                             | 0.04934                                | 0.06007  | 2.78669E-5        |
| 4.8   | 0.00454                                | 0.05215                                | 0.04213  | 1.96331E-5        |
| 5     | 4.126E-5                               | 0.04761                                | 0.04755  | 1.29493E-5        |
| 5.2   | 0.005                                  | 0.05044                                | 0.04508  | 9.0294E-6         |
| 5.4   | 0.01                                   | 0.05138                                | 0.05563  | 6.62853E-6        |
| 5.6   | 8.16633E-5                             | 0.10864                                | 0.42269  | 8.61915E-5        |

**Table S9.** Best-fitting parameters of the generalized single Debye model for the frequency dependence of the out-of-phase molar magnetic susceptibility ( $\chi''$ ) as a function of the temperature for **{2-Nd<sub>2</sub>}** ( $H_{dc} = 2200$  Oe).

| T / K | $\chi_s / \text{cm}^3 \text{mol}^{-1}$ | $\chi_t / \text{cm}^3 \text{mol}^{-1}$ | $\alpha$ | $\tau / \text{s}$ |
|-------|----------------------------------------|----------------------------------------|----------|-------------------|
| 1.8   | 0.00446                                | 0.11437                                | 0.13922  | 1.44957E-4        |
| 2     | 0.01484                                | 0.1217                                 | 0.13324  | 1.31826E-4        |
| 2.2   | 2.63847E-5                             | 0.10522                                | 0.14481  | 1.16839E-4        |
| 2.4   | 0.00208                                | 0.10517                                | 0.15592  | 1.03597E-4        |
| 2.6   | 7.44116E-5                             | 0.10222                                | 0.17622  | 9.02279E-5        |
| 2.8   | 4.10429E-5                             | 0.09807                                | 0.17458  | 7.67977E-5        |
| 3     | 5.824E-4                               | 0.09641                                | 0.18527  | 7.49687E-5        |
| 3.2   | 9.07882E-5                             | 0.09346                                | 0.19173  | 6.77536E-5        |
| 3.4   | 3.0048E-5                              | 0.08986                                | 0.18924  | 6.30861E-5        |
| 3.6   | 1.29367E-5                             | 0.08612                                | 0.18289  | 5.85901E-5        |
| 3.8   | 3.72409E-5                             | 0.08345                                | 0.17948  | 5.09193E-5        |
| 4     | 1.68093E-4                             | 0.07801                                | 0.15064  | 5.00945E-5        |
| 4.2   | 2.74396E-4                             | 0.07485                                | 0.13826  | 4.62849E-5        |
| 4.4   | 0.00148                                | 0.07283                                | 0.12428  | 4.25622E-5        |
| 4.6   | 4.34814E-4                             | 0.06864                                | 0.10726  | 3.84366E-5        |
| 4.8   | 0.00211                                | 0.06799                                | 0.09109  | 3.42219E-5        |
| 5     | 0.00246                                | 0.06567                                | 0.08136  | 2.90943E-5        |
| 5.2   | 0.00475                                | 0.06536                                | 0.0629   | 2.74024E-5        |
| 5.4   | 0.00481                                | 0.06238                                | 0.04792  | 2.41691E-5        |
| 5.6   | 0.00653                                | 0.06372                                | 0.05043  | 2.06952E-5        |
| 5.8   | 1.05785E-4                             | 0.05526                                | 0.03766  | 1.79985E-5        |
| 6     | 0.00492                                | 0.05953                                | 0.04051  | 1.42471E-5        |

**Table S10.** Summary of the best-fitting parameters of the temperature dependence of the relaxation time of magnetization ( $\tau$ ) of **{1-Nd<sub>2</sub>}** ( $H_{dc} = 2400$  Oe) and **{2-Nd<sub>2</sub>}** ( $H_{dc} = 2200$  Oe).

| Mechanism | Parameter    | {1-Nd <sub>2</sub> }                  | {2-Nd <sub>2</sub> }                 |
|-----------|--------------|---------------------------------------|--------------------------------------|
| QTM       | $\tau_{QTM}$ | $1.05 \cdot 10^{-4}$ s                | $1.34 \cdot 10^{-4}$ s               |
| Raman     | $C$          | $0.051 \text{ s}^{-1} \text{ K}^{-n}$ | $56.8 \text{ s}^{-1} \text{ K}^{-n}$ |
|           | $n$          | 8.66                                  | 3.83                                 |

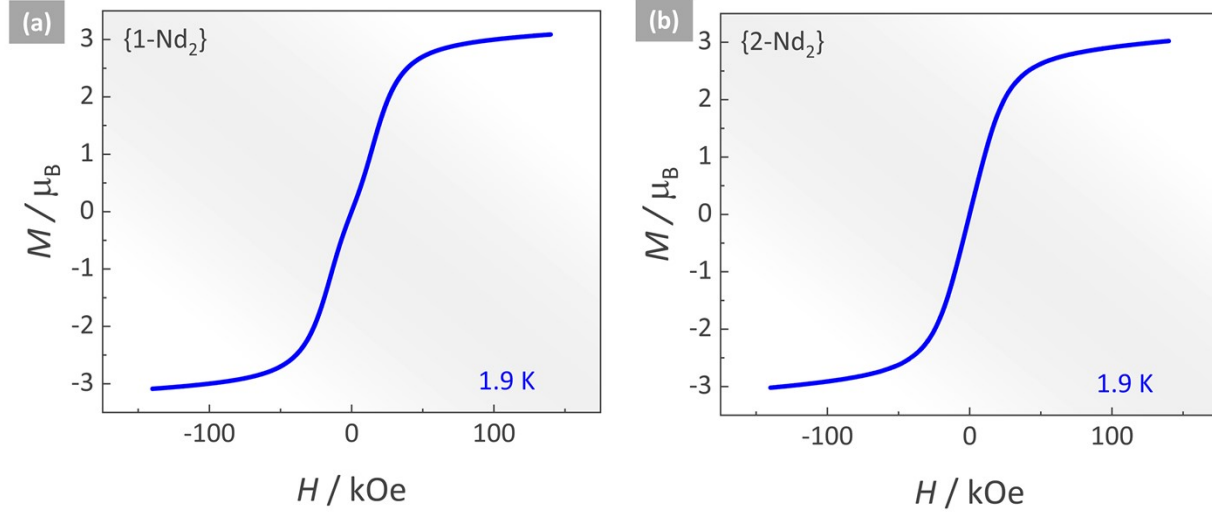

**Fig. S10.** Magnetic hysteresis at 1.9 K for **{1-Nd<sub>2</sub>}** and **{2-Nd<sub>2</sub>}**. No retention of the magnetization is observed.

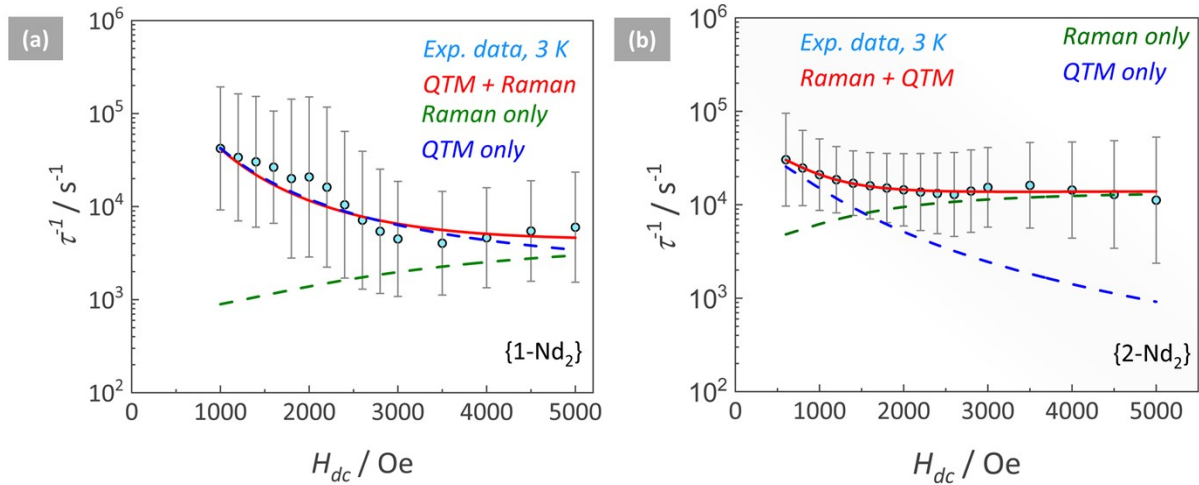

**Fig. S11.** Comparison of the field dependence of the relaxation time of magnetization ( $\tau$ ) at 3 K for (a) **{1-Nd<sub>2</sub>}** and (b) **{2-Nd<sub>2</sub>}**. The solid lines represent the best fit to a combination of QTM and Raman mechanisms.

## Supplementary Note S5 – Additional Luminescence Data

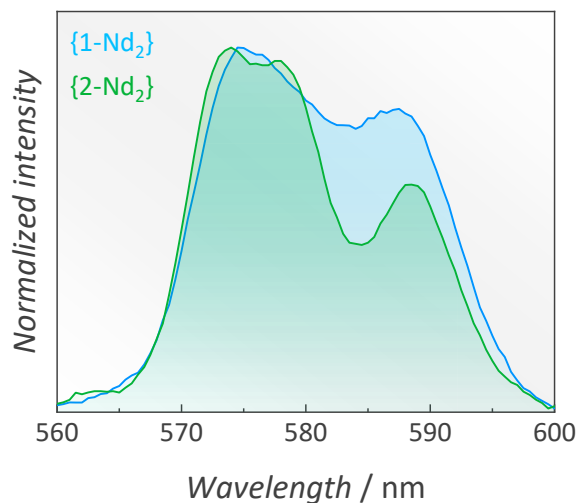

**Fig. S12.** Excitation ( $\lambda_{em} = 1060$  nm, 10 K) spectra of **{1-Nd<sub>2</sub>}** and **{2-Nd<sub>2</sub>}** crushed crystals within the 560 – 600 nm spectral range assigned to the  $^4I_{9/2} \rightarrow ^4G_{5/2} + ^2G_{7/2}$  transitions.

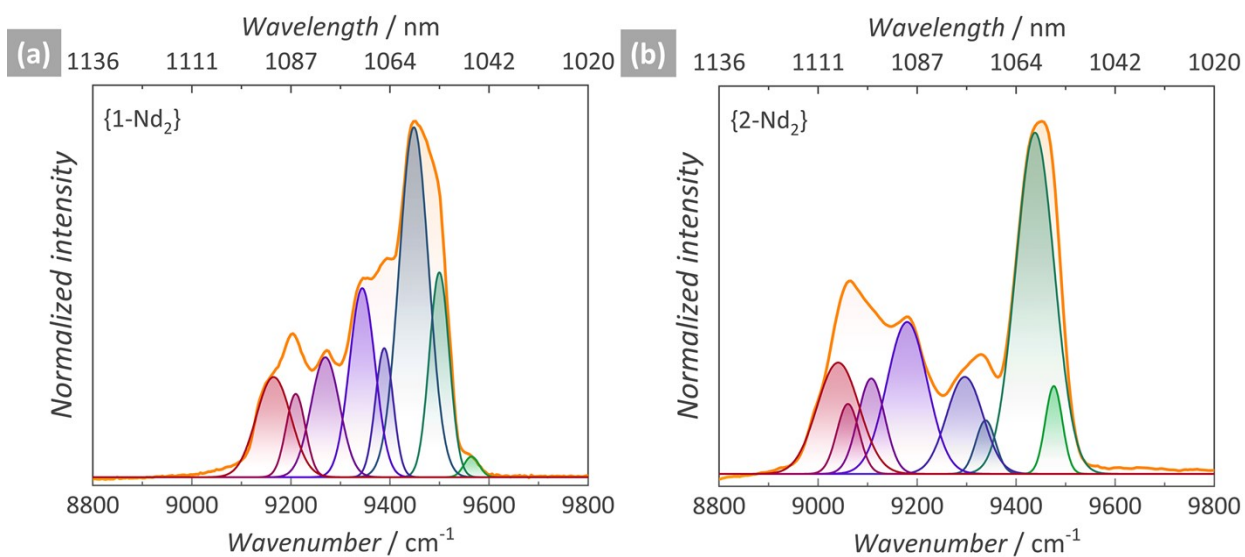

**Fig. S13.** Deconvolution of the emission spectrum of (a) **{1-Nd<sub>2</sub>}** and (b) **{2-Nd<sub>2</sub>}** crushed crystals measured at 10 K by applying a gaussian function ( $R^2 > 0.99$ ) monitoring the  $^4F_{3/2} \rightarrow ^4I_{11/2}$  transition region.

## Supplementary references

---

- <sup>1</sup> J. Long, F. Habib, P-H. Lin, I. Korobkov, G. Enright, L. Ungur, W. Wernsdorfer, L. F. Chibotaru, M. Murugesu Single-Molecule Magnet Behavior for an Antiferromagnetically Superexchange-Coupled Dinuclear Dysprosium(III) Complex. *J. Am. Chem. Soc.* 2011, **133**, 5319.
- <sup>2</sup> APEX Software Suite v 2010 Bruker AXS Inc. Madison Wisconsin USA, **2010**.
- <sup>3</sup> R. H. Blessing, An empirical correction for absorption anisotropy. *Acta Crystallogr. Sect. A* 1995, **A51**, 33.
- <sup>4</sup> G. M. Sheldrick, A short history of SHELX. *Acta Crystallogr. A.* 2008 **A64**, 112.
- <sup>5</sup> C. B. Hübschle, G. M. Sheldrick, B. Dittrich, ShelXle: a Qt graphical user interface for SHELXL. *J. Appl. Crystallogr.* 2011, **44**, 1281.
- <sup>6</sup> C. D. S. Brites, A. Millán, L. D. Carlos, Lanthanides in Luminescent Thermometry. In: Handbook on the Physics and Chemistry of Rare Earths; Elsevier, 2016; pp 339-427.
